# Supplementary material for: Self-Assembly Study of Block Copolypeptoids in Response to pH and Temperature Stimulation
Source: MDPI journal article supplement (doi:10.3390/polym16081082), 2024-04-12
Supplement: s1 [file s1]

# Self-Assembly Study of Block Copolypeptoids in Response to pH and Temperature Stimulation

Di Liu, Kang Yang, Liugen Xu, Xiran Shen, Lei Feng, Yangang Jiang, Amjad Ali, Jianwei Lu \* and Li Guo \*

School of Materials Science & Engineering, Jiangsu University,  
Zhenjiang 212013, China

\* Correspondence: jianwei@ujs.edu.cn (J.L.); liguo@ujs.edu.cn (L.G.)

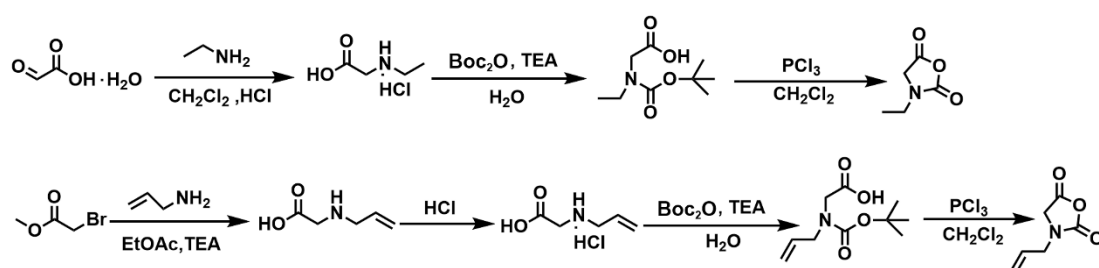

**Scheme S1.** Synthetic pathways of Al-NCA and Et-NCA monomers.

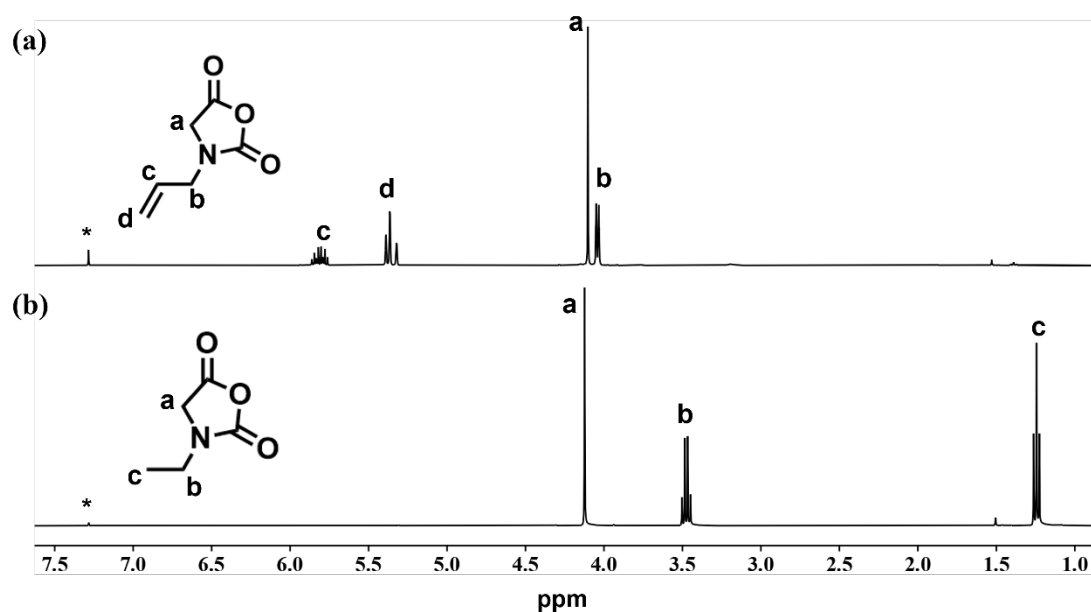

**Figure S1.**  $^1\text{H}$  NMR spectra of (a) Al-NCA and (b) Et-NCA in  $\text{CDCl}_3$  (\* indicates solvents).

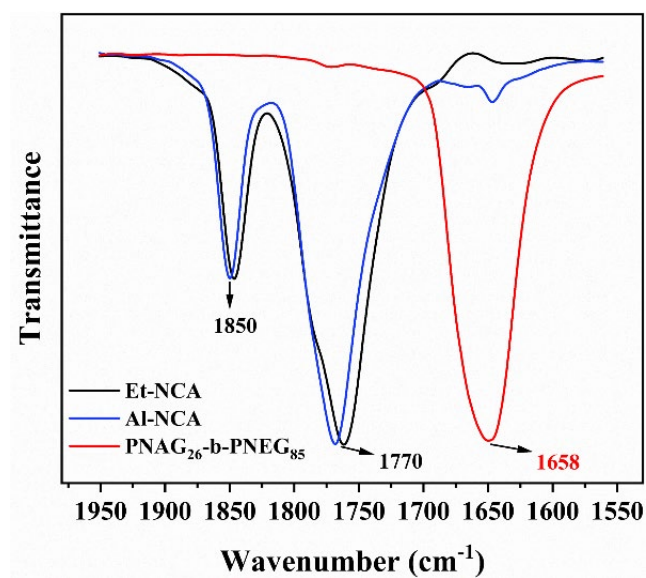

**Figure S2.** FTIR spectra of Et-NCA, Al-NCA and PNAG<sub>26</sub>-b-PNEG<sub>85</sub>.

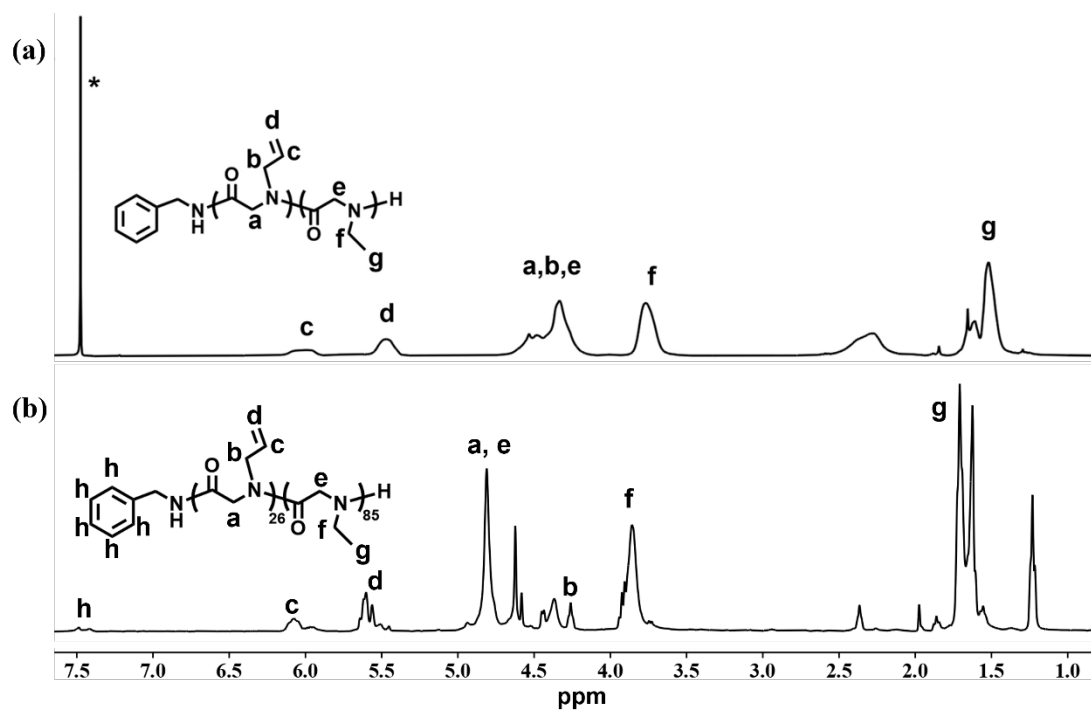

**Figure S3.** <sup>1</sup>H NMR spectra of PNAG<sub>26</sub>-b-PNEG<sub>85</sub> in (a) CDCl<sub>3</sub> and (b) TFA-d (\* indicates solvents).

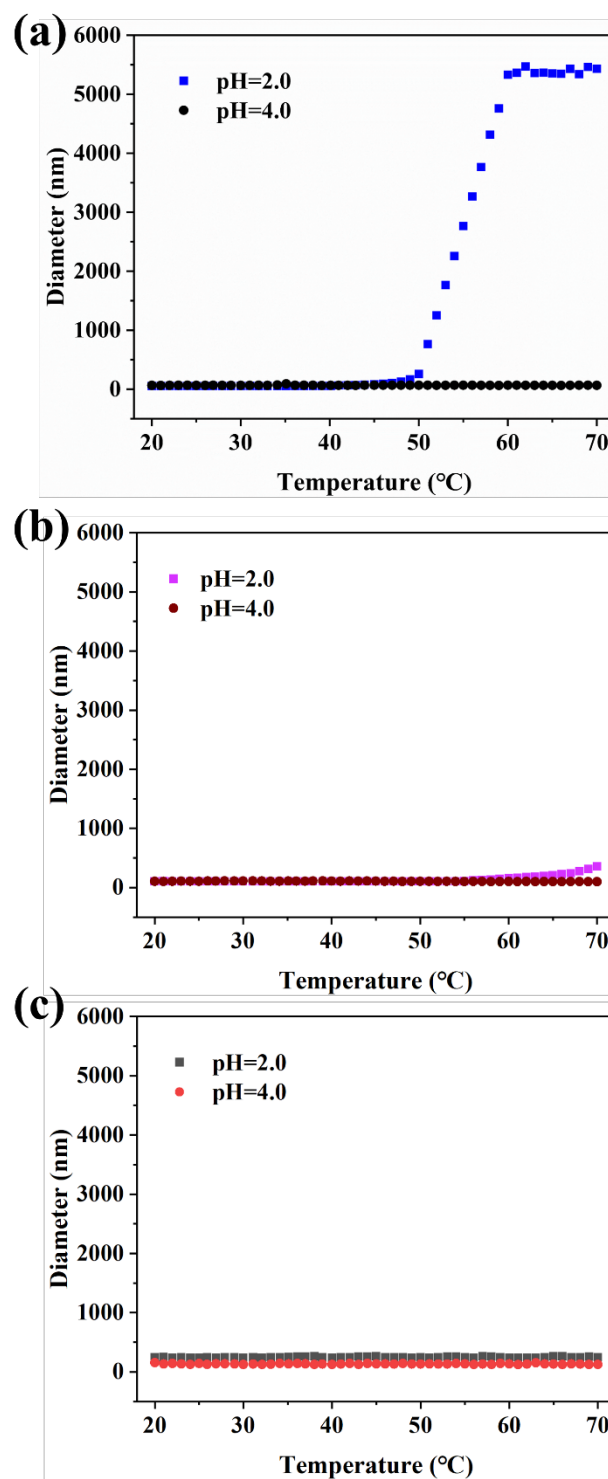

**Figure S4** Plots of diameter as a function of temperature for aqueous solutions (2 mg/mL) of (a) (PNAG<sub>13</sub>-b-PNPEG<sub>77</sub>)-COOH, (b) (PNAG<sub>12</sub>-b-NPEG<sub>92</sub>)-COOH and (c) (PNAG<sub>15</sub>-b-NEG<sub>135</sub>)-COOH at pH=2.0 and 4.0

**Table S1.** The cloud point temperatures of (PNAG<sub>26</sub>-b-PNEG<sub>85</sub>)-COOH tested by UV-Vis under different pH values and concentrations

| Tcp (°C) | pH  | Concentration (mg/mL) |
|----------|-----|-----------------------|
| 45       | 4.0 | 2.0                   |
| 41       | 3.0 | 2.0                   |
| 37       | 2.0 | 2.0                   |
| 38       | 2.0 | 1.0                   |
| 34       | 2.0 | 5.0                   |
